# Supplementary material for: Molecular Profiling of Endometrial Cancer: An Exploratory Study in Aotearoa, New Zealand
Source: MDPI journal article supplement (doi:10.3390/cancers13225641), 2021-11-11
Supplement: s1 [file s1]

## Supplementary Materials: Molecular Profiling of Endometrial Cancer: an Exploratory Study in Aotearoa, New Zealand

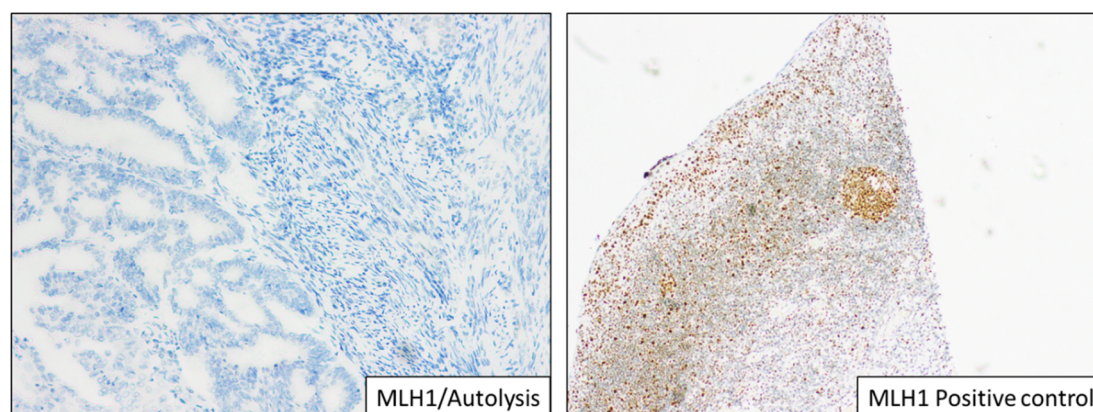

**Figure S1.** Example of insufficient staining patterns in autolysed endometrial tissue.

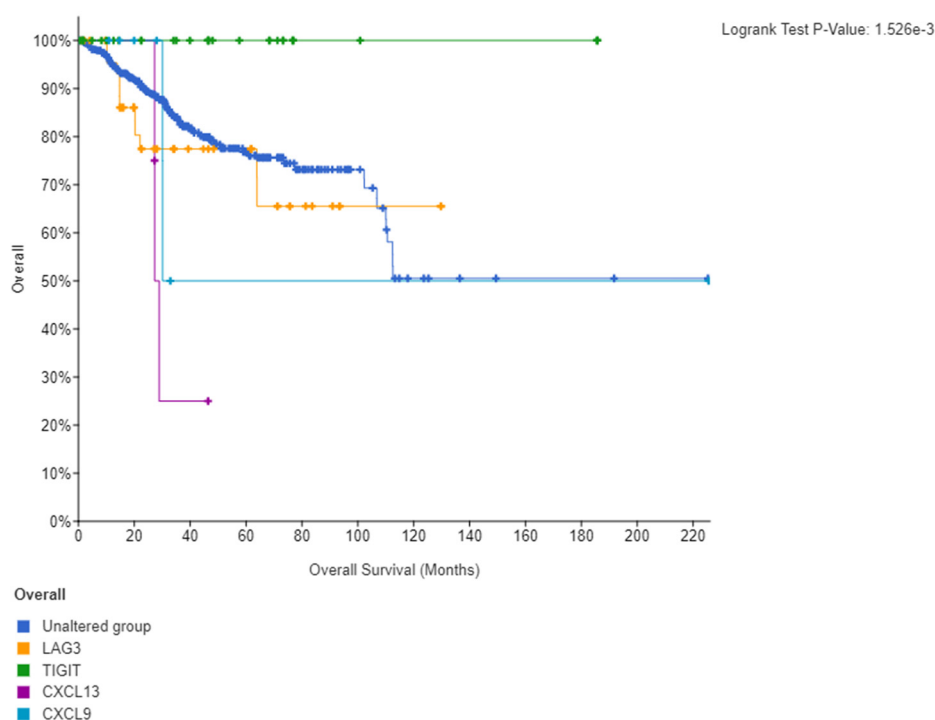

|                 | Number of Cases, Total | Number of Events | Median Months Overall (95% CI) |
|-----------------|------------------------|------------------|--------------------------------|
| Unaltered group | 1241                   | 189              | NA                             |
| LAG3            | 47                     | 11               | NA                             |
| TIGIT           | 32                     | 0                | NA                             |
| CXCL13          | 4                      | 3                | 27.27 (27.24 - NA)             |
| CXCL9           | 8                      | 2                | 30.11 (30.09 - NA)             |

**Figure S2.** Cbioportal output; Kaplan meier survival of altered immune genes identified in Figure 5; LAG3, TIGIT, CXCL13 and CXCL9.

**Table S1.** IHC conditions.

| Antibody      | MLH1           | MSH2             | MSH6           | P53          | PMS2           | L1CAM           |
|---------------|----------------|------------------|----------------|--------------|----------------|-----------------|
| Control       | Tonsil         | Tonsil           | Tonsil         | Tonsil       | Tonsil         | Kidney          |
| RTU/TITRATION | 1:25           | 1:100            | 1:50           | RTU          | 1:50           | 1:100           |
| Clone         | ES05           | G219-1129        | EP49           | BP-53-11     | EP51           | 14.1            |
| Reference     | M3640          | 286M-14          | M3646          | 760-2542     | M3647          | L1              |
| Supplier      | DAKO (Denmark) | CELLMARQUE (USA) | DAKO (Denmark) | ROCHE (USA)  | DAKO (Denmark) | Biolegend (USA) |
| Detection     | Optiview DAB   | Optiview DAB     | Optiview DAB   | Optiview DAB | Optiview DAB   | Optiview DAB    |
| HIER          | CC1            | CC1              | CC1            | CC1          | CC1            | CC1             |
| HIER Temp     | 100            | 100              | 100            | 95           | 100            | 95              |
| HIER Time     | 40             | 40               | 48             | 48           | 64             | 56              |
| AB Time       | 32             | 16               | 32             | 20           | 24             | 32              |
| Amp           | N/A            | Optiview AMP     | N/A            | N/A          | Optiview AMP   | n/a             |
| Amp Time      | N/A            | 4 minutes        | N/A            | N/A          | 4 minutes      | n/a             |

**Table S2.** CTNNB1 mutations.

| HGVS coding | HGVS Protein | Location | Sample number |
|-------------|--------------|----------|---------------|
| c.110C>G    | S37C         | exon 3   | 22            |
| c.101G>A    | G34E         | exon 3   | 26            |
| c.110C>G    | S37C         | exon 3   | 32            |
| c.101G>T    | G34V         | exon 3   | 39            |
| c.110C>T    | S37F         | exon 3   | 35            |
| c.94G>T     | D32Y         | exon 3   | 6             |
| c.110C>T    | S37F         | exon 3   | 43            |
| c.95A>T     | D32V         | exon 3   | 45            |
| c.122C>T    | T41I         | exon 3   | 57            |
| c.101G>T    | G34V         | exon 3   | 79            |
| c.110C>T    | S37F         | exon 3   | 71            |

**Table S3.** Women who had recurrent endometrial cancer during the study period.

| Histology | Stage | Grade | Subtype     | Treatment                                             | Recurrence (months) |
|-----------|-------|-------|-------------|-------------------------------------------------------|---------------------|
| E         | IB    | 1     | MMRd        | Brachytherapy                                         | 33                  |
| E         | IA    | 1     | NSMP        | clinical follow up only, radiotherapy upon recurrence | 48                  |
| E         | II    | 2     | NSMP        | Pelvic radiotherapy                                   | 8                   |
| E         | II    | 2     | MMRd        | Chemoradiation therapy                                | 27                  |
| E         | IV    | 3     | p53mut/POLE | Chemotherapy                                          | passed away         |
| E         | IA    | 1     | CTNNB1      | clinical follow up only, radiotherapy upon recurrence | 15                  |
| E         | II    | 1     | MMRd        | Pelvic radiotherapy                                   | 19                  |
| E         | IA    | 2     | NSMP        | clinical followup only                                | 38                  |
| E         | IA    | 2     | NSMP        | clinical follow up only                               | 33                  |
| E         | IVB   | 2     | NSMP        | declined treatment                                    | passed away         |
| E         | IB    | 3     | p53mut      | Pelvic radiotherapy                                   | 13                  |
| E/S       | IA    | 3     | p53mut      | declined treatment                                    | 18                  |
| S         | IA    | 3     | p53mut      | Brachytherapy                                         | 15                  |

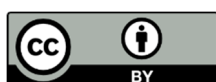

© 2021 by the author. Licensee MDPI, Basel, Switzerland. This article is an open access article distributed under the terms and conditions of the Creative Commons Attribution (CC BY) license (<https://creativecommons.org/licenses/by/4.0/>).
